# Supplementary material
Source: Springer Nature journal article supplement (https://www.springermedizin.de/resource/supplementary/13023_2011_311_MOESM3_ESM.pdf/9642084)

**Exhibit 5 Number of drugs developed with a \$1B investment**

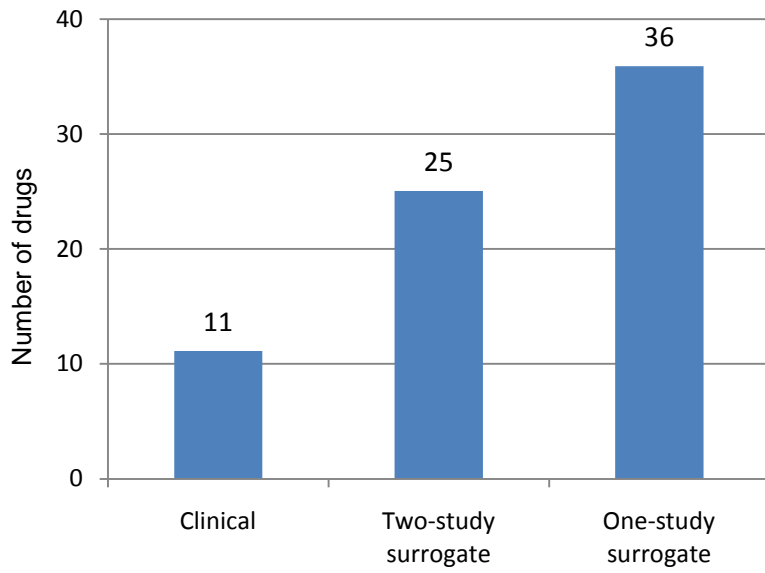

Clinical Program

Supplement: MOESM3 [file 9642084]
